# Supplementary material
Source: publisher figshare collection journal article supplement (https://rs.figshare.com/ndownloader/files/23890636)
Supplement: Supplementary file 1 [file 23890636]

**Data Figure 1 (**Obtained by digitization of a figure in Woldringh & New (1999)

| **Amsterdam Utrecht** (NL, 1993) | |  | **Stilton Fen**  (UK, 1993) | |  | **Ledsgard**  (Sweden, 1997) | |
| --- | --- | --- | --- | --- | --- | --- | --- |
| Scaled speed | Amplitude |  | Scaled speed | Amplitude |  | Scaled speed | Amplitude |
| 0.189833 | 0.99325 |  | 0.572183 | 1.16086 |  | 0.035118 | 0.97462 |
| 0.379317 | 1.05342 |  | 0.631668 | 1.34428 |  | 0.298569 | 0.97027 |
| 0.428786 | 1.43167 |  | 0.635043 | 1.37383 |  | 0.605780 | 1.06657 |
| 0.474655 | 1.1780 |  | 0.718066 | 1.54558 |  | 0.681049 | 1.48631 |
| 0.620442 | 1.30288 |  | 0.755106 | 1.66391 |  | 0.738363 | 1.85869 |
| 0.663069 | 1.37399 |  | 0.754038 | 1.80563 |  | 0.766326 | 1.68760 |
| 0.663136 | 1.55116 |  | 0.779836 | 1.84122 |  | 0.758582 | 1.96511 |
| 0.707979 | 1.55143 |  | 0.765284 | 1.90019 |  | 0.792243 | 2.04208 |
| 0.778801 | 2.07153 |  | 0.821528 | 2.40839 |  | 0.869679 | 2.26104 |
| 0.778836 | 2.16602 |  |  |  |  | 0.863122 | 2.71573 |
| 0.810264 | 2.2666 |  |  |  |  | 0.869895 | 2.83978 |
| 0.861922 | 2.50312 |  |  |  |  |  |  |
| 0.906834 | 2.68646 |  |  |  |  |  |  |
| 0.945032 | 2.90519 |  |  |  |  |  |  |
